# Supplementary material for: Genetic Characteristics and Phylogeographic Dynamics of Lagoviruses, 1988–2021
Source: MDPI journal article supplement (doi:10.3390/v15040815), 2023-03-23

Genetic characteristics and phylogeographic dynamics of Lagoviruses, 1988-2021

Pir Tariq Shah<sup>1#</sup>, Amina Nawal Bahoussi <sup>1#</sup>, Caiting Yang<sup>1</sup>, Guanhan Yao<sup>2</sup>, Li Dong<sup>1,3,4,5</sup>, Changxin Wu<sup>1,3,4,5</sup>, Li Xing<sup>1, 3,4,5\*</sup>

**Supplementary Figure 1. The phylogenetic tree based on the full-length genome sequences of lagoviruses, 1988-2021.** The unrooted ML phylogenetic tree of 240 full-length Lagovirus genomes classifying all the strains into four major clades (RCV, HaCV/EBHSV, GI.1/RHDV and GI.2/RHDV2). GI.1 can be further classified into four sub-clades (1a-1d) and GI.2 into six sub-clades (2a-2f). The major clades and sub-clades of the RHDV are indicated. The percentage of replicate trees in which the associated taxa clustered together in the bootstrap test (1000 replicates) are indicated at each node. The evolutionary distances were computed using the best-fit substitution model (SYM+I+G4 ). The red color clades represent Germany (n=69), green USA (n=24), blue Poland (n=22) and yellow color represents Portugal (n=13). The tree was visualized and modified proportionally using FigTree v1.4. The viruses used in genomic similarity analysis (Figure 2) are highlighted using blue boxes.

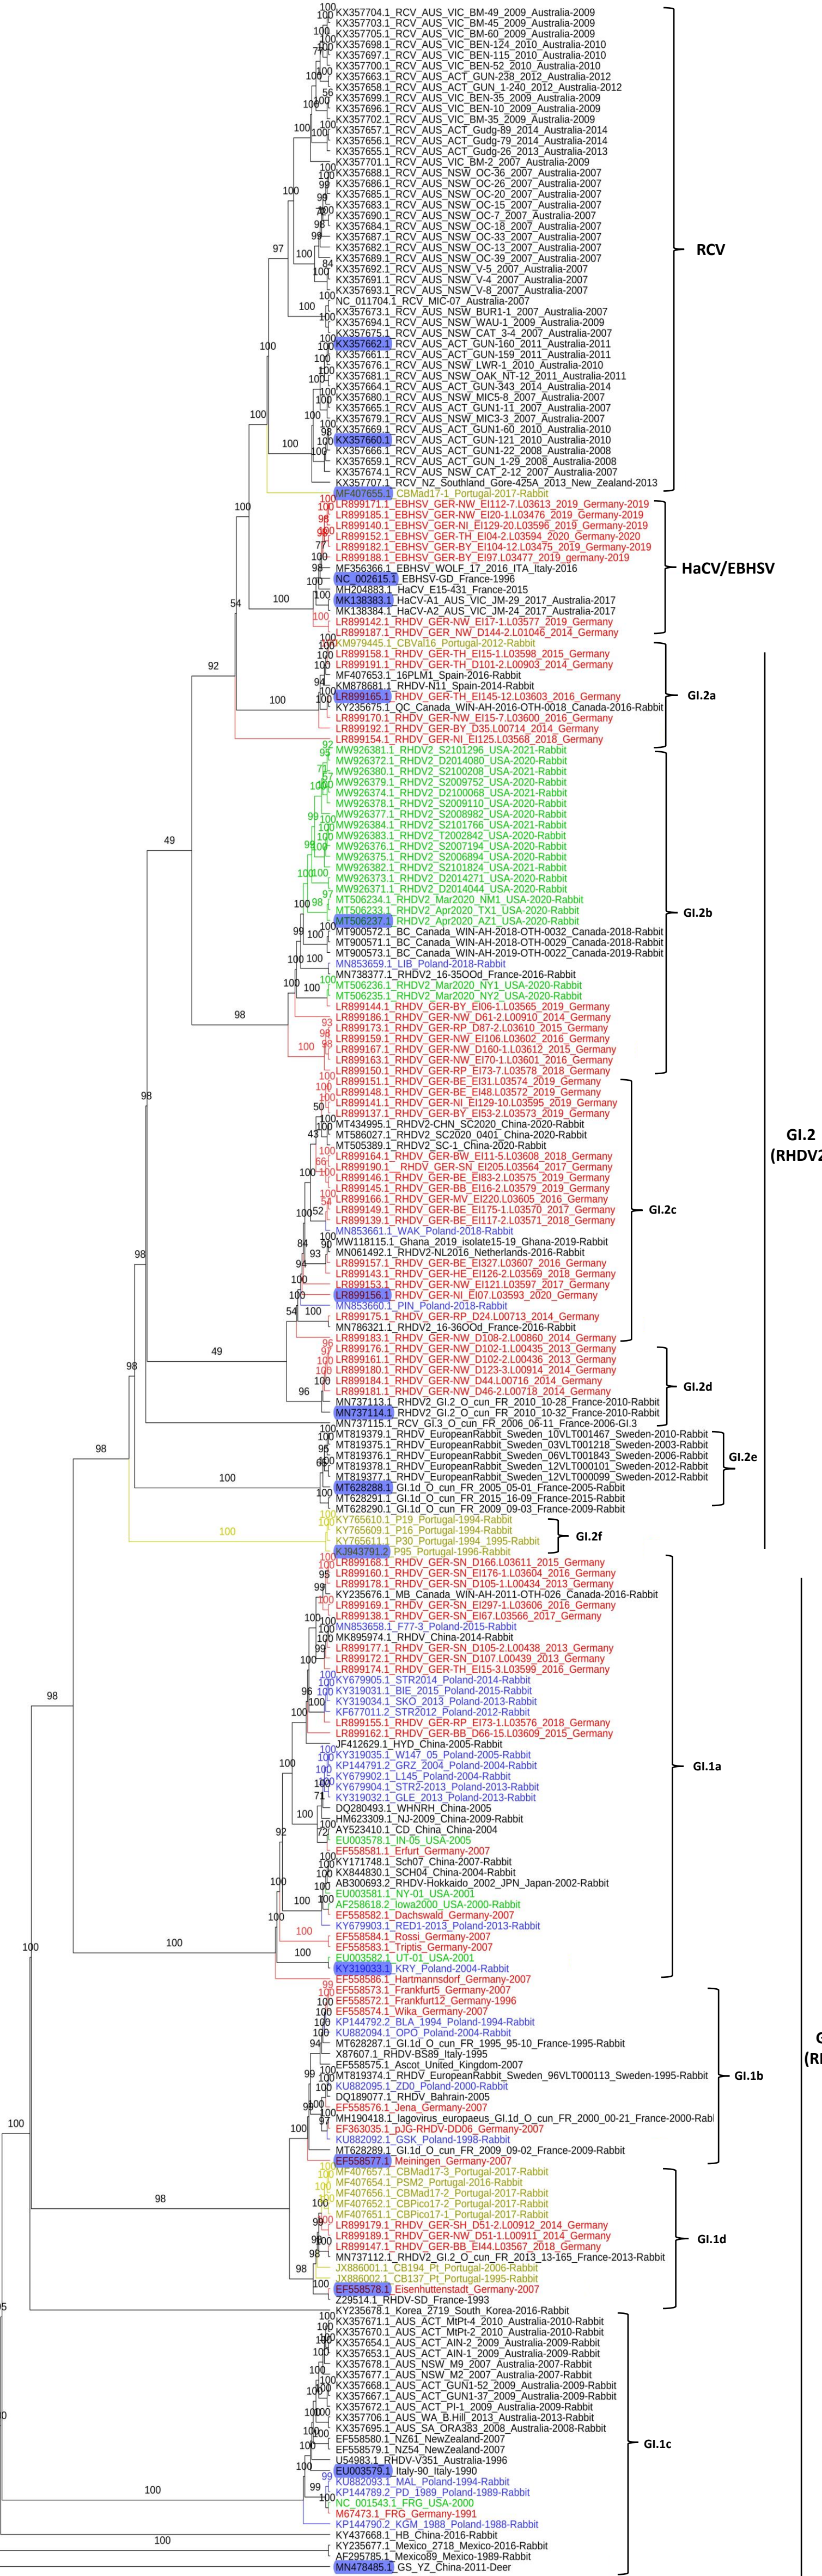



Phylogenetic tree showing the relationships between various RHDV and EBHSV strains. The tree is rooted on the left and branches out to the right. Strains are labeled with accession numbers, host names, and locations. The tree is color-coded by clade: G1.2c (red), G1.2a (yellow), G1.2b (green), G1.2d (blue), RCV (purple), HaCV/EBHSV (orange), G1.1a (pink), G1.1d (brown), G1.1b (grey), and G1.1c (black). Bootstrap values are shown at the nodes. The tree shows a clear separation between the G1.2 clades and the other clades, with G1.2c and G1.2a being the most closely related.

**G1.2c**

LR899151.1 RHDV GER-BE E131.L03574\_2019 Germany  
 LR899148.1 RHDV GER-BE E148.L03572\_2019 Germany  
 LR899141.1 RHDV GER-NI E129-10.L03595\_2019 Germany  
 LR899137.1 RHDV GER-BY E153-2.L03573\_2019 Germany  
 LR899164.1 RHDV GER-BW E111-5.L03608\_2018 Germany  
 LR899190.1 RHDV GER-SN E1205.L03564\_2017 Germany  
 LR899166.1 RHDV GER-MV E1220.L03605\_2016 Germany  
 LR899149.1 RHDV GER-BE E1175-1.L03570\_2017 Germany  
 LR899139.1 RHDV GER-BE E1117-2.L03571\_2018 Germany  
 MN853661.1 WAK Poland-2018-Rabbit  
 MT505389.1 RHDV2 SC-1 China-2020-Rabbit  
 MT434995.1 RHDV2 CHN SC2020 China-2020-Rabbit  
 MT586027.1 RHDV2 SC2020\_0401 China-2020-Rabbit  
 LR899146.1 RHDV GER-BE E183-2.L03575\_2019 Germany  
 LR899145.1 RHDV GER-BB E116-2.L03579\_2019 Germany  
 LR899142.1 RHDV GER-NW E117-1.L03577\_2019 Germany  
 MW118115.1 Ghana 2019 isolate15-19 Ghana-2019-Rabbit  
 MN061492.1 RHDV2-NL2016 Netherlands-2016-Rabbit  
 LR899156.1 RHDV GER-NI E107.L03593\_2020 Germany  
 LR899143.1 RHDV GER-HE E1126-2.L03569\_2018 Germany  
 MN853660.1 PIN Poland-2018-Rabbit  
 LR899153.1 RHDV GER-NW E1121.L03597\_2017 Germany  
 LR899157.1 RHDV GER-BE E1327.L03607\_2016 Germany  
 LR899154.1 RHDV GER-NI E1125.L03568\_2018 Germany  
 MF407653.1 16PLM1 Spain-2016-Rabbit  
 LR899191.1 RHDV GER-TH D101-2.L00903\_2014 Germany  
 LR899187.1 RHDV GER NW D144-2.L01046\_2014 Germany  
 LR899173.1 RHDV GER-RP D87-2.L03610\_2015 Germany  
 LR899163.1 RHDV GER-NW E170-1.L03601\_2016 Germany  
 LR899159.1 RHDV GER-NW E1106.L03602\_2016 Germany  
 LR899167.1 RHDV GER-NW D160-1.L03612\_2015 Germany  
 LR899150.1 RHDV GER-RP E173-7.L03578\_2018 Germany  
 LR899147.1 RHDV GER-BB E144.L03567\_2018 Germany  
 MN737112.1 RHDV2 Gl.2 O cun FR 2013 13-165 France-2013-Rabbit  
 LR899158.1 RHDV GER-TH E115-1.L03598\_2015 Germany  
 KM979445.1 CBVal16 Portugal-2012-Rabbit  
 MF407657.1 CBMad17-3 Portugal-2017-Rabbit  
 MF407654.1 PSM2 Portugal-2016-Rabbit  
 MF407656.1 CBMad17-2 Portugal-2017-Rabbit  
 MF407652.1 CBPico17-2 Portugal-2017-Rabbit  
 MF407651.1 CBPico17-1 Portugal-2017-Rabbit  
 LR899179.1 RHDV GER-SH D51-2.L00912\_2014 Germany  
 LR899189.1 RHDV GER-NW D51-1.L00911\_2014 Germany  
 MF407655.1 CBMad17-1 Portugal-2017-Rabbit  
 KM878681.1 RHDV-N11 Spain-2014-Rabbit  
 LR899165.1 RHDV GER-TH E1145-12.L03603\_2016 Germany  
 KY235675.1 QC Canada WIN-AH-2016-OTH-0018 Canada-2016-Rabbit  
 LR899170.1 RHDV GER-NW E115-7.L03600\_2016 Germany  
 LR899192.1 RHDV GER-BY D35.L00714\_2014 Germany  
 MW926373.1 RHDV2 D2014271 USA-2020-Rabbit  
 MW926371.1 RHDV2 D2014044 USA-2020-Rabbit  
 MW926372.1 RHDV2 D2014080 USA-2020-Rabbit  
 MW926380.1 RHDV2 S2100208 USA-2021-Rabbit  
 MW926381.1 RHDV2 S2101296 USA-2021-Rabbit  
 MW926379.1 RHDV2 S2009752 USA-2020-Rabbit  
 MW926378.1 RHDV2 S2009110 USA-2020-Rabbit  
 MW926374.1 RHDV2 D2100068 USA-2021-Rabbit  
 MW926377.1 RHDV2 S2008982 USA-2020-Rabbit  
 MW926384.1 RHDV2 S2101766 USA-2021-Rabbit  
 MW926383.1 RHDV2 T2002842 USA-2020-Rabbit  
 MW926376.1 RHDV2 S2007194 USA-2020-Rabbit  
 MW926375.1 RHDV2 S2006894 USA-2020-Rabbit  
 MW926382.1 RHDV2 S2101824 USA-2021-Rabbit  
 MT506237.1 RHDV2 Apr2020 AZ1 USA-2020-Rabbit  
 MT506233.1 RHDV2 Apr2020 TX1 USA-2020-Rabbit  
 MT506234.1 RHDV2 Mar2020 NMI USA-2020-Rabbit  
 MT900572.1 BC Canada WIN-AH-2018-OTH-0032 Canada-2018-Rabbit  
 MT900571.1 BC Canada WIN-AH-2018-OTH-0029 Canada-2018-Rabbit  
 MT900573.1 BC Canada WIN-AH-2019-OTH-0022 Canada-2019-Rabbit  
 MN853659.1 LIB Poland-2018-Rabbit  
 MN738377.1 RHDV2 16-350Od France-2016-Rabbit  
 MT506236.1 RHDV2 Mar2020 NY1 USA-2020-Rabbit  
 MT506235.1 RHDV2 Mar2020 NY2 USA-2020-Rabbit  
 LR899144.1 RHDV GER-BY E106-1.L03565\_2019 Germany  
 LR899180.1 RHDV GER-NW D123-3.L00914\_2014 Germany  
 LR899176.1 RHDV GER-NW D102-1.L00435\_2013 Germany  
 LR899161.1 RHDV GER-NW D102-2.L00436\_2013 Germany  
 LR899184.1 RHDV GER-NW D44.L00716\_2014 Germany  
 LR899181.1 RHDV GER-NW D46-2.L00718\_2014 Germany  
 MN737113.1 RHDV2 Gl.2 O cun FR 2010 10-28 France-2010-Rabbit  
 LR899186.1 RHDV GER-NW D61-2.L00910\_2014 Germany  
 MN737114.1 RHDV2 Gl.2 O cun FR 2010 10-32 France-2010-Rabbit  
 LR899183.1 RHDV GER-NW D108-2.L00860\_2014 Germany  
 LR899175.1 RHDV GER-RP D24.L00713\_2014 Germany  
 MN786321.1 RHDV2 16-360Od France-2016-Rabbit  
 KX357704.1 RCV AUS VIC BM-49 2009 Australia-2009  
 KX357703.1 RCV AUS VIC BM-45 2009 Australia-2009  
 KX357705.1 RCV AUS VIC BM-60 2009 Australia-2009  
 KX357698.1 RCV AUS VIC BEN-124 2010 Australia-2010  
 KX357697.1 RCV AUS VIC BEN-115 2010 Australia-2010  
 KX357700.1 RCV AUS VIC BEN-52 2010 Australia-2010  
 KX357663.1 RCV AUS ACT GUN-238 2012 Australia-2012  
 KX357658.1 RCV AUS ACT GUN 1-240 2012 Australia-2012  
 KX357702.1 RCV AUS VIC BM-35 2009 Australia-2009  
 KX357696.1 RCV AUS VIC BEN-10 2009 Australia-2009  
 KX357699.1 RCV AUS VIC BEN-35 2009 Australia-2009  
 KX357701.1 RCV AUS VIC BM-2 2007 Australia-2009  
 KX357657.1 RCV AUS ACT Guld-89 2014 Australia-2014  
 KX357656.1 RCV AUS ACT Guld-79 2014 Australia-2014  
 KX357693.1 RCV AUS NSW V-8 2007 Australia-2007  
 KX357692.1 RCV AUS NSW V-5 2007 Australia-2007  
 KX357691.1 RCV AUS NSW V-4 2007 Australia-2007  
 KX357682.1 RCV AUS NSW OC-13 2007 Australia-2007  
 KX357690.1 RCV AUS NSW OC-7 2007 Australia-2007  
 KX357684.1 RCV AUS NSW OC-18 2007 Australia-2007  
 KX357687.1 RCV AUS NSW OC-33 2007 Australia-2007  
 KX357688.1 RCV AUS NSW OC-36 2007 Australia-2007  
 KX357686.1 RCV AUS NSW OC-26 2007 Australia-2007  
 KX357685.1 RCV AUS NSW OC-20 2007 Australia-2007  
 KX357689.1 RCV AUS NSW OC-39 20



**Supplementary Figure 3. The phylogenetic tree based on VP10 coding sequences of Lagoviruses, 1988-2021.** An unrooted ML phylogenetic tree of 240 VP10 coding sequences of Lagoviruses classifying all the strains into three major clades (GI.1/RHDV, RCV and GI.2/RHDV2). All the HaCV/EBHSV strains appeared within the GI.2/RHDV2 clade. The major clades and sub-clades of the RHDV are indicated. The percentage of replicate trees in which the associated taxa clustered together in the bootstrap test (1000 replicates) are indicated at each node. The evolutionary distances were computed using the best-fit substitution model (TIM+*F*+*I*+*G*+4). The red color clades represent Germany (n=69), green USA (n=24), blue Poland (n=22) and yellow color represents Portugal (n=13). The trees were constructed with IQ-TREE v1.6.12, visualized and modified proportionally using FigTree v1.4.

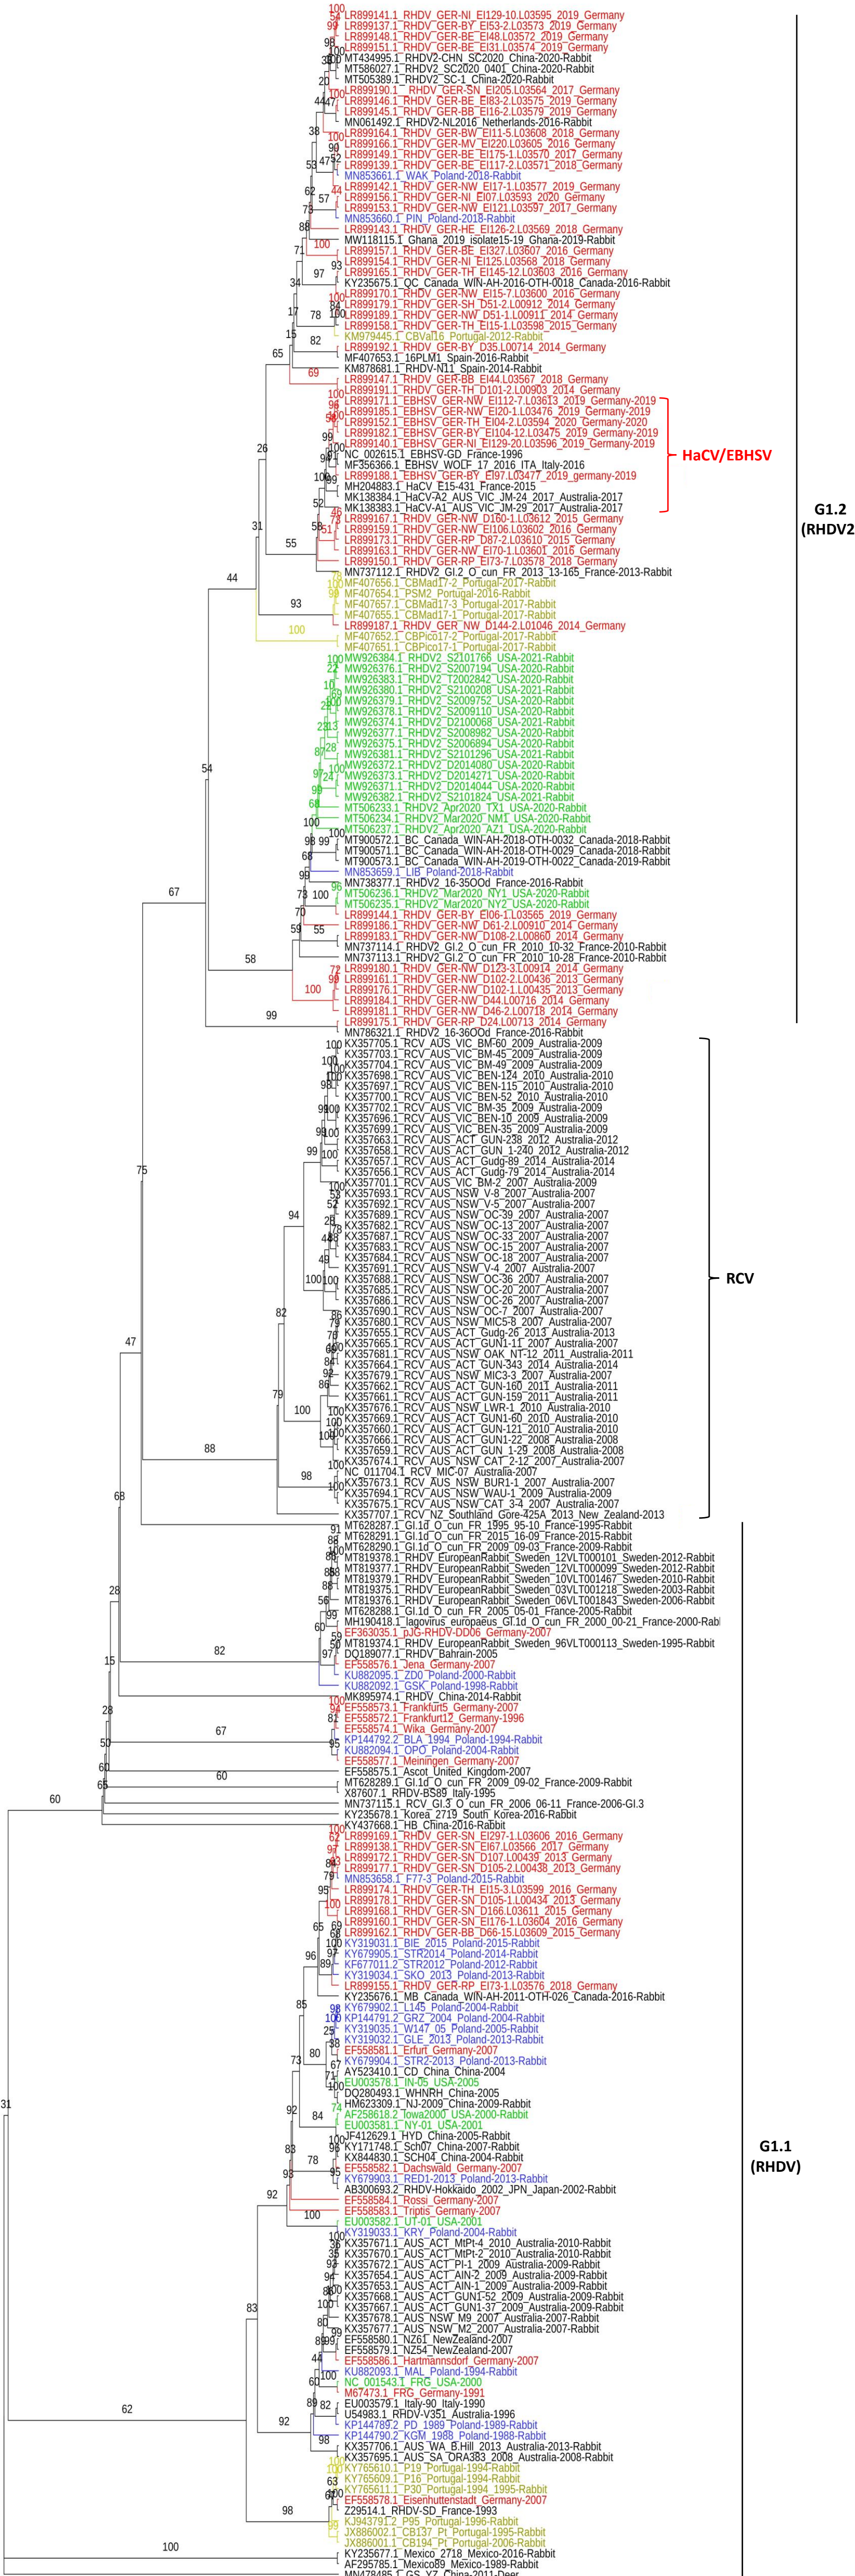



**Supplementary Figure 4. The phylogenetic analysis based on the indicated fragments of lagovirus genomes involved in recombination events.** Phylogenetic tree based on the region nt 1 to 3,500 (**A**), nt 3501 to 5200 (**B**), and nt 5201 to 7437 (**C**) of lagovirus genome. The viruses involved in recombination events are labelled with different symbols in the phylogenetic trees constructed using the neighbour-joining method. The recombinant, major parent and minor parent are indicated with red, orange, and blue colors respectively. The nucleotide sequence is relative to virus FRG (Germany-1991)(GenBank: M67473.1).

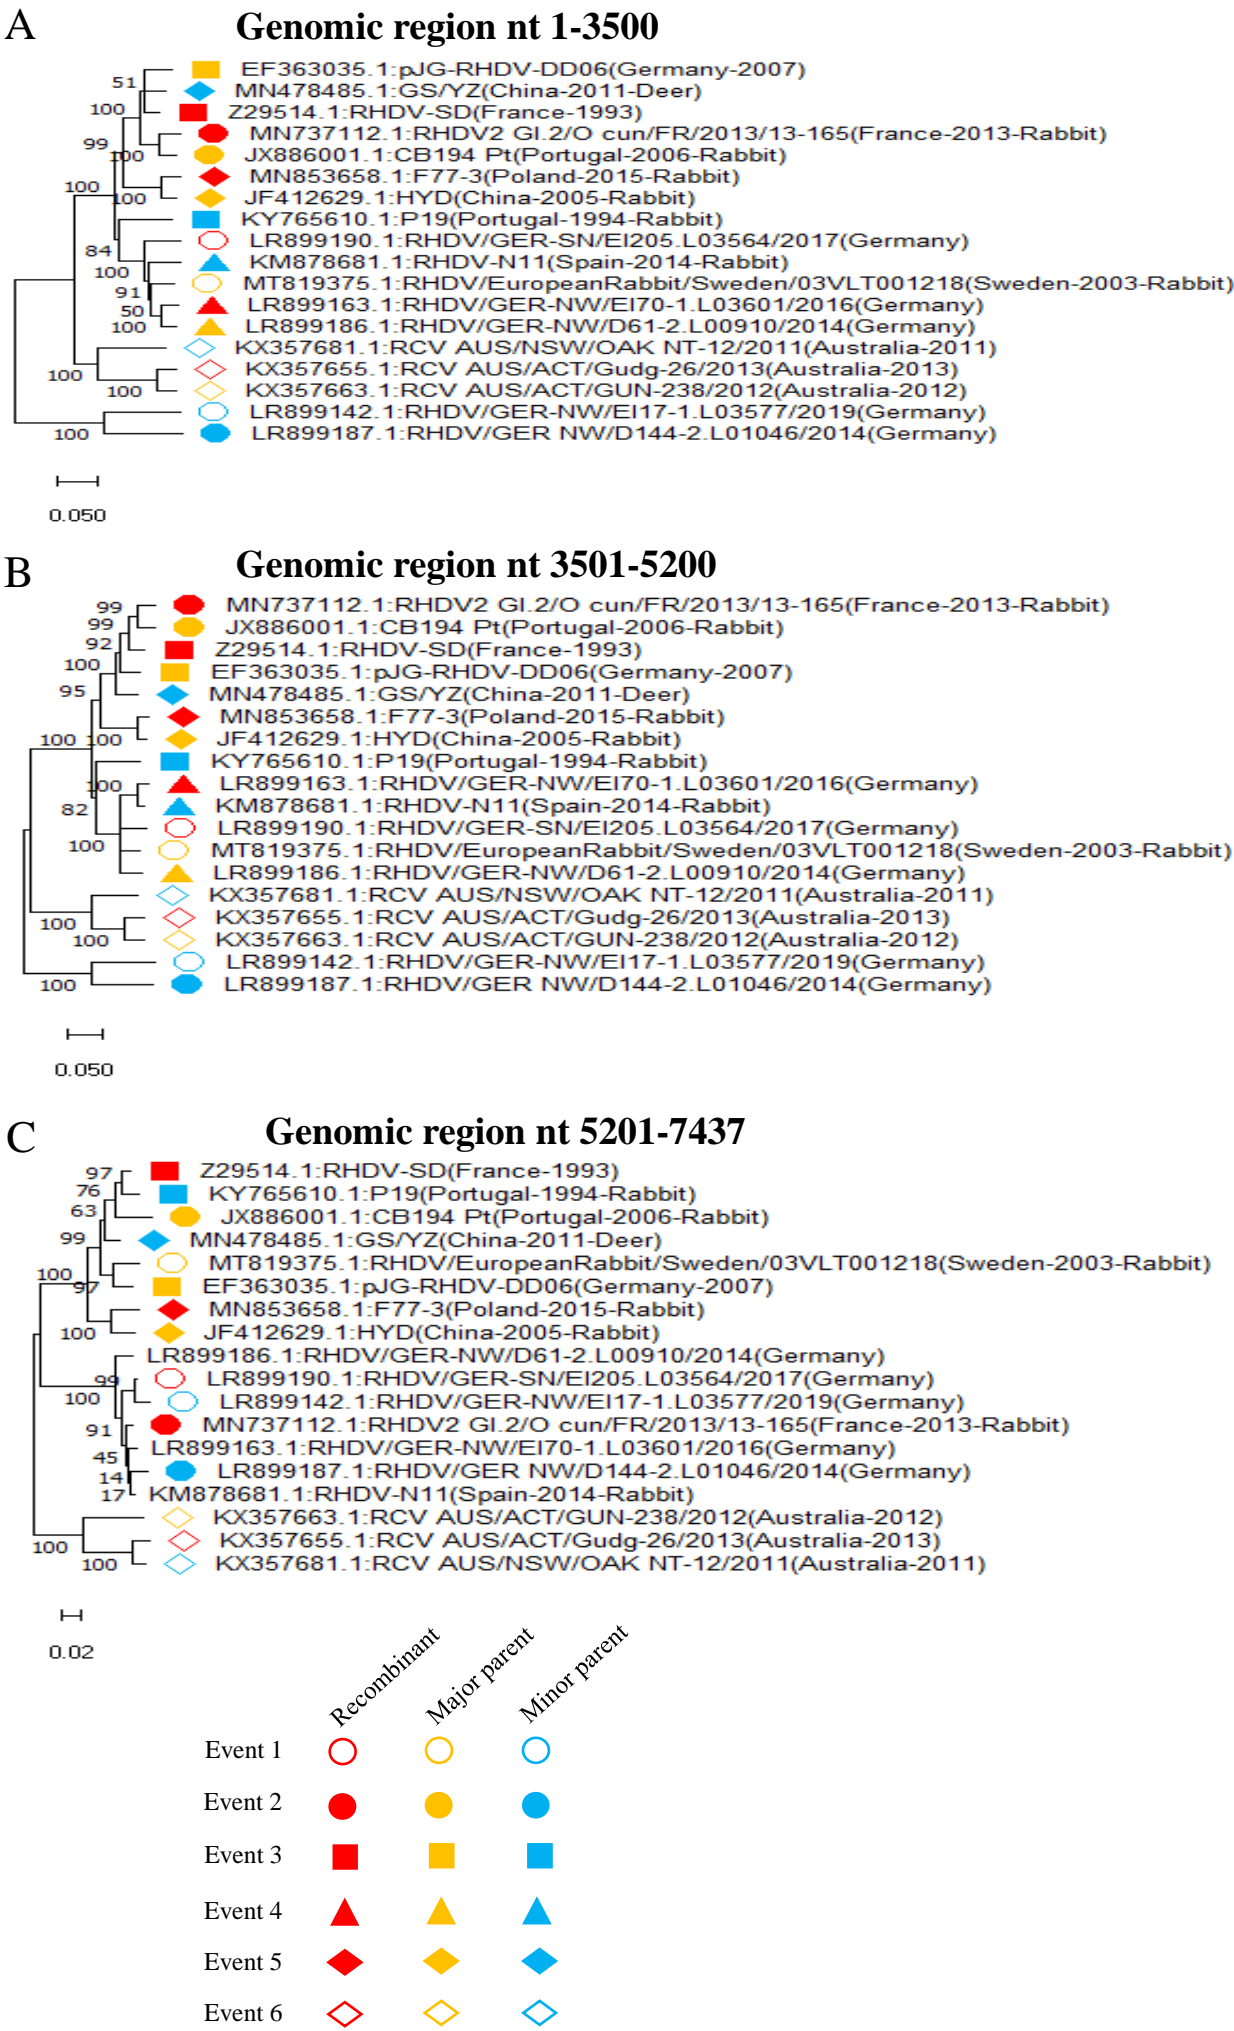

Supplement: s1 [file s1]
